# Supplementary material for: Recyclable CuO nanoparticles as heterogeneous catalysts for the synthesis of xanthenes under solvent free conditions
Source: Royal Society of Chemistry journal article supplement (doi:10.1039/c4ra07620f), 2014-01-01
Supplement: c4ra07620f1.pdf [file c4ra07620f1.pdf]

## Recyclable CuO nanoparticles as heterogeneous catalyst for synthesis of xanthenes under solvent free conditions

Ganga Ram Chaudhary\*, Pratibha Bansal, Navneet Kaur, S.K. Mehta

Department of Chemistry & Centre of Advanced Studies in Chemistry, Panjab University,  
Chandigarh - 160014, India

### Supporting Information

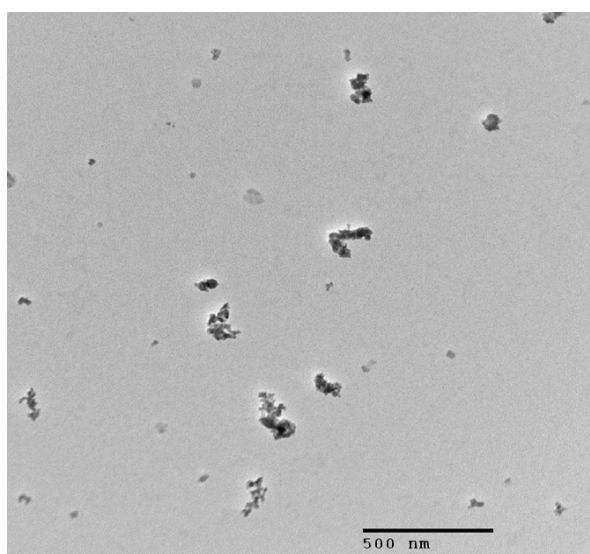

Fig. S1 TEM of fourth time recycled CuO NPs

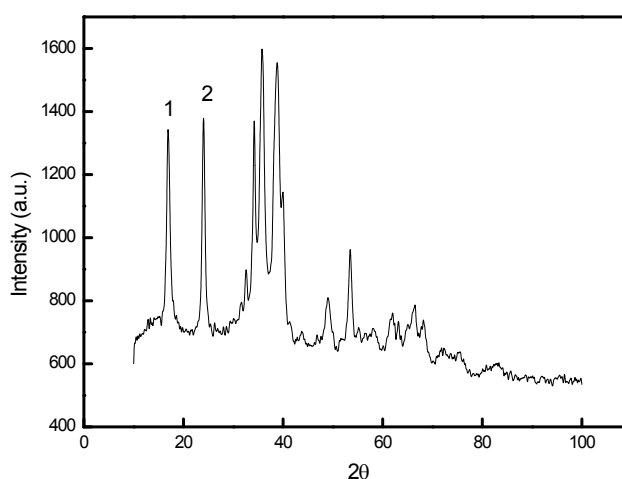

Fig. S2 XRD of sample before 4 minutes of synthesis

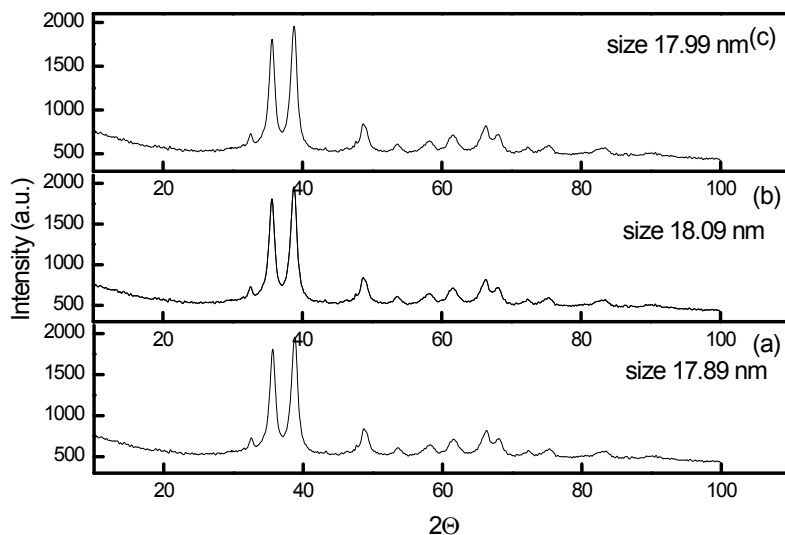

Fig. S3 XRD of CuO NPs (a) first time synthesized (b) second time synthesized after 24 hours (c) third time synthesized after 48 hours

NMR of 5b (14-(4-Methylphenyl)-14H-dibenzo[a, j]xanthenes) product purified by different methods Fig. S4 (a) by recrystallization (b) Flash chromatography

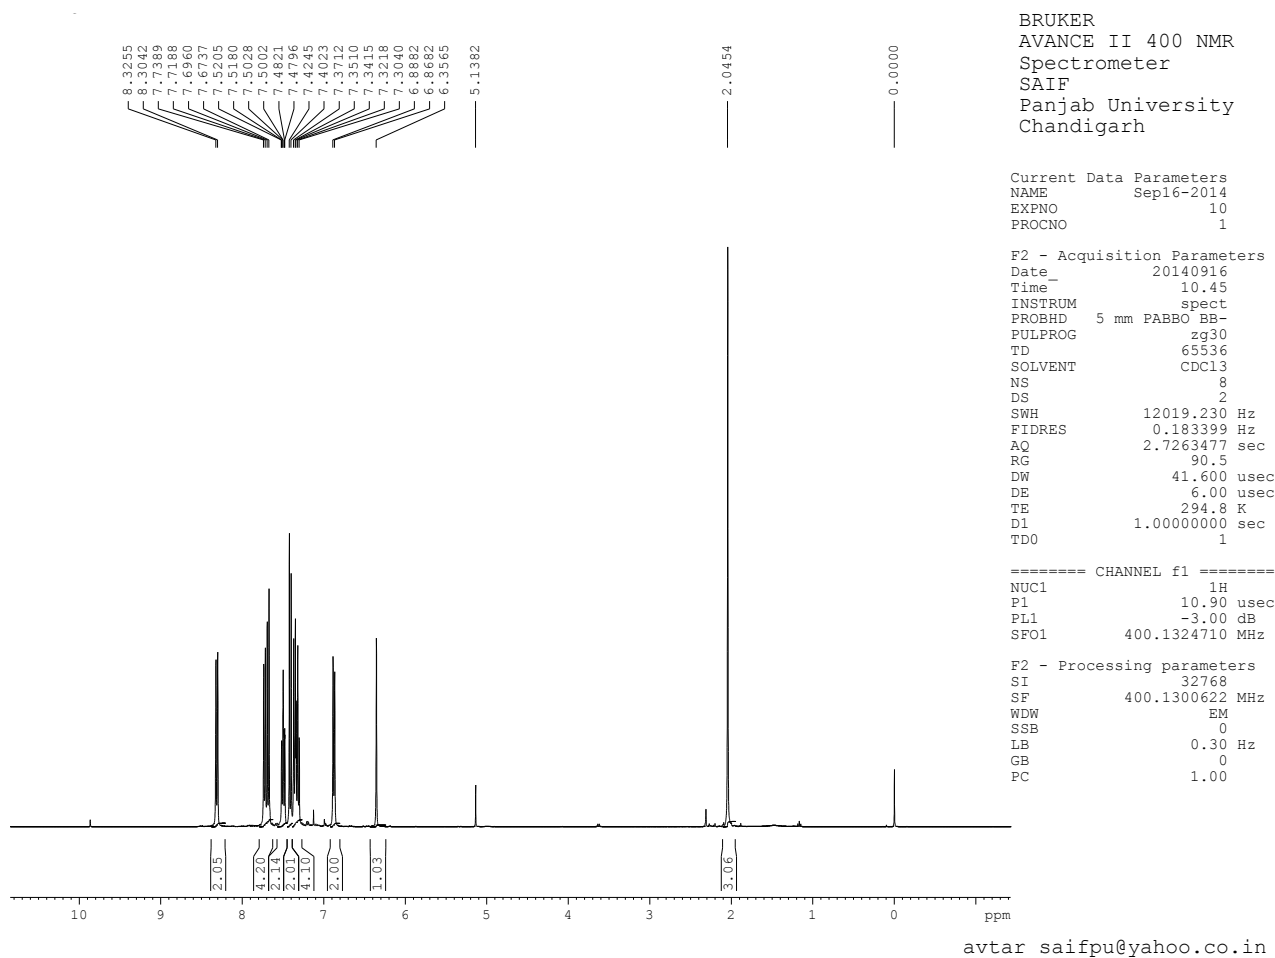

Fig S4 (a) By recrystallization

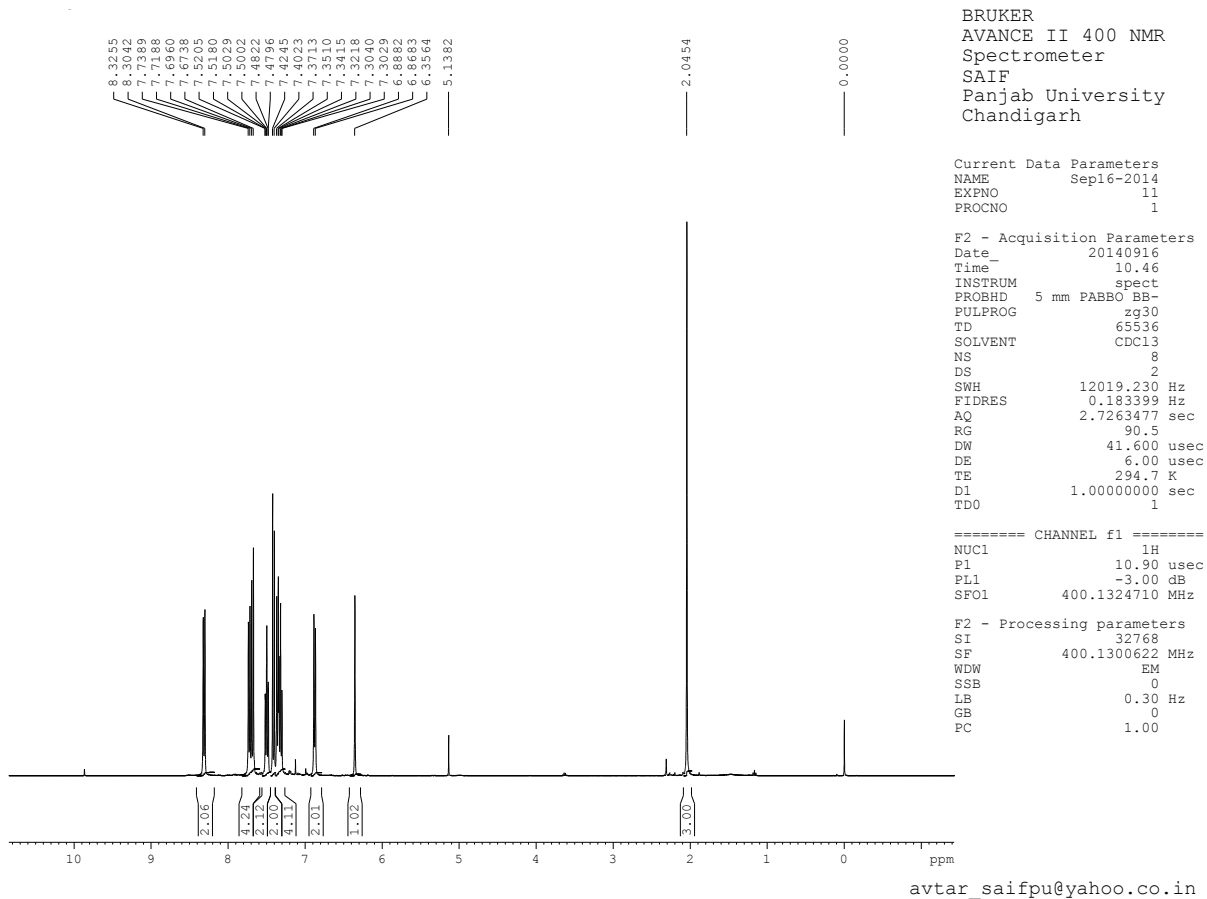

Fig. S4 (b) By Flash Chromatography
